# Supplementary material
Source: PubMed Central journal article supplement (PMC2674130)
Supplement: NIHMS93546-supplement-supplement_1.pdf [file NIHMS93546-supplement-supplement_1.pdf]

**Figure 7. Membrane fluidity and cleavage of APP in neuronal cells.** SH-SY5Y-APP695 cells were treated as described in Materials and Methods; **A)** Membrane fluidity of living cells was correlated to endogenous  $A\beta_{(1-40)}$  levels [pg/mg protein]; cells were treated for 24 h with Lovastatin (1, 2 & 4  $\mu$ M), Benzyl alcohol (5 & 10 mM) and Pluronic F68 (4.5 & 7.5  $\mu$ M); **B-D)** Representative fluorescence microscopy images of the SH-SY5Y-APP695 cells; **B)** Fluoro-oligo $A\beta_{(1-40)}$  was added to the medium and cells were incubated for 24h; **C)** Cells were stained for GM-1 ganglioside using Alexa 555-conjugated cholera toxin subunit B; **D)** Co-localization of Fluoro-oligo $A\beta_{(1-40)}$  and Alexa 555-conjugated cholera toxin sub-unit B. Data are means  $\pm$  SD; n=6-12.

**Supplementary Figure 1. Characterization of  $A\beta_{(1-40)}$  species.**  $A\beta_{(1-40)}$  peptides were prepared as described in Materials and Methods. Native SDS-PAGE gel electrophoresis followed by silver staining reveals **A)** monomeric  $A\beta_{(1-40)}$  (Mono; MW 4 kDa) in the disaggregated (monomer, Mono) preparation and **B)** predominantly  $A\beta_{(1-40)}$  polymers (MW 50 - 75 kDa) in the oligomeric (Oligo) and Fibrillar (Fibril) preparation. The oligomeric preparation also contains dimers (MW 11 kDa). Electron micrographs of negatively stained  $A\beta_{(1-40)}$  **C)** oligomers and **D)** fibrils reveal predominantly spherical aggregates and proto-fibrils or mature amyloid fibrils, respectively (magnification: 7.000; scale bar:  $\mu$ m).

**Supplementary Figure 2. Effects of  $A\beta_{(1-40)}$  species on membrane properties and production of  $A\beta_{(1-42)}$ ;** HEK293-APP695 cells were incubated for 24h in the presence or absence of 2 $\mu$ M **A)** monomeric (mono), **C)** oligomeric (oligo) or **E)** fibrillar (fibril)  $A\beta_{(1-40)}$ ; **B), D), F)** Changes in the membrane fluidity, which is inversely correlated to the anisotropy of the fluorescence probe TMA-DPH, were determined using fluorescence polarization spectroscopy in living cells; Levels of endogenous  $A\beta_{(1-42)}$  were determined by ELISA [pg/mg protein]. Data are means  $\pm$  SD n=3-6 (n.s. not significant;  $p^* < 0.05$ ;  $p^{***} < 0.001$ ).

**Supplementary Figure 3. Levels of sAPP $\alpha$ ;** Secreted levels of sAPP $\alpha$  (ng/ml) were determined by ELISA [ng/ml] in collected conditioned media of HEK293 and HEK293-APP695 cells, respectively. Data are means  $\pm$  SD n=4 ( $p^{***} < 0.001$ ).
